# Supplementary material for: Glycan Epitopes on 201B7 Human-Induced Pluripotent Stem Cells Using R-10G and R-17F Marker Antibodies
Source: MDPI journal article supplement (doi:10.3390/biom11040508), 2021-03-29

**Figure S1.** Elution profile obtained by first affinity chromatography of 201B7 cell crude extract using an R-10G column followed by Western blotting using R-10G.

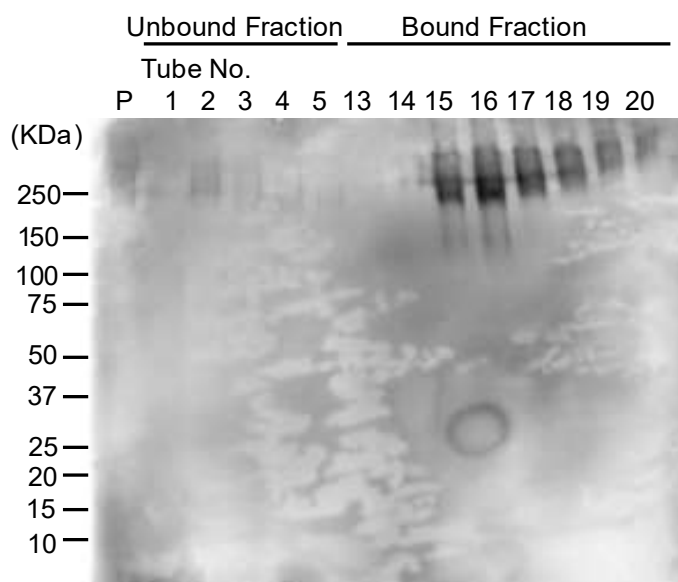

**Figure S2.** Elution profile obtained by re-affinity chromatography of the pooled bound fraction in Figure S1 using an R-10G column followed by Western blotting using R-10G.

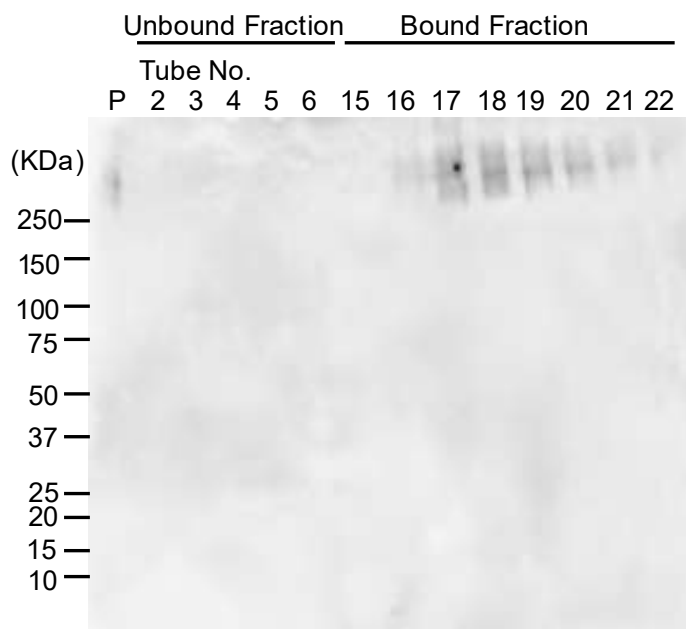

**Figure S3.** Semi-quantitative comparison of the expression level of the R-10G epitope on 201B7 and Tic cells by Western blotting.

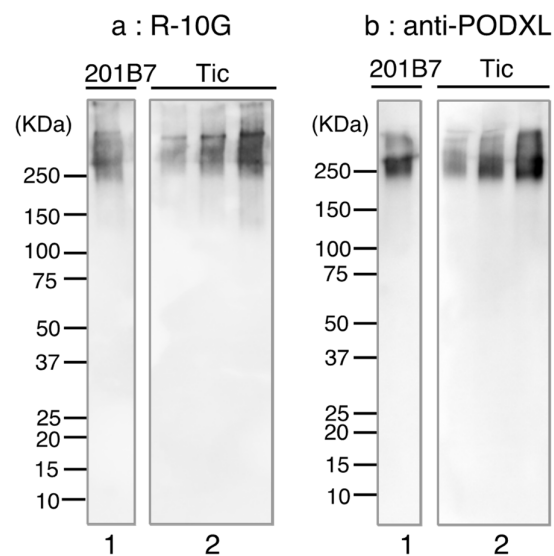

**Figure S4.** Localization of G-10G (a) and R-17F(b) epitopes on cultured 201B7 cells visualized on laser confocal microscopy.

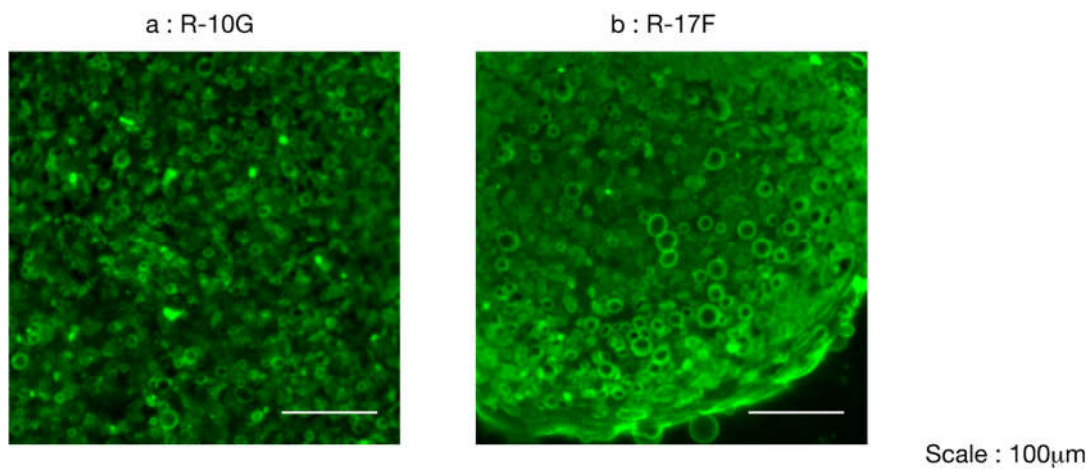

Supplement: s1 [file s1]
